# Supplementary material for: Design of triphenylamine appended anthracene derivatives: electro-polymerization and their electro-chromic behaviour
Source: Royal Society of Chemistry journal article supplement (doi:10.1039/c6ra14926j), 2016-01-01
Supplement: c6ra14926j1.pdf [file c6ra14926j1.pdf]

## Supporting Information

### **Design of Triphenylamine Appended Anthracene Derivatives: Electro-polymerization and their Electro-chromic Behaviours**

Dines Chandra Santra, Sanoy Mondal and Sudip Malik

|                                                                                                                                           |            |
|-------------------------------------------------------------------------------------------------------------------------------------------|------------|
| <b>1. Synthesis procedure of all monomers</b>                                                                                             | <b>2-3</b> |
| <b>2. <sup>1</sup>H NMR, <sup>13</sup>C NMR and MALDI-TOF spectra of all monomers</b>                                                     | <b>4-8</b> |
| <b>3. Scheme of Electropolymerization and oxidation process path</b>                                                                      | <b>9</b>   |
| <b>4. Scan rate dependent UV-Vis spectra</b>                                                                                              | <b>9</b>   |
| <b>5. Repeated CV scanning of 2-TPACNANT</b>                                                                                              | <b>10</b>  |
| <b>6. Cyclic voltammogram of ferrocene</b>                                                                                                | <b>10</b>  |
| <b>7. IR spectra of two monomer and two polymers</b>                                                                                      | <b>11</b>  |
| <b>8. Cyclic voltammograms of the fabricated electrochromic device based on polymer film for (a) p-2,6-TPAANT and (b) p-2,6-TPACNANT.</b> | <b>12</b>  |

## 1. Synthesis of all monomers:

### 2. *4-N,N-diphenylaminophenyl-2-(4-(9,10-bis(octyloxy)anthracen-6-yl)phenyl)acrylonitrile (2-TPACNANT):*

Dry and degassed EtOH (8 mL) and 2 M aqueous Na<sub>2</sub>CO<sub>3</sub> (16 mL) were added to the solution of compound **1** (503.28 mg, 1.01 mmol), compound **B** (513.55 mg, 1.00 mmol) and Pd(PPh<sub>3</sub>)<sub>4</sub> (60 mg, 0.052 mmol) in 32 mL toluene under nitrogen atmosphere. After being refluxed at 110<sup>0</sup>C for 48 h, the mixture was poured into water (100 mL). The organic layer was extracted with chloroform (3×40 mL) and the combined organic layers were dried over anhydrous Na<sub>2</sub>SO<sub>4</sub>. The organic solvent was evaporated under reduced pressure and the crude product was purified by silica column chromatography eluting with petroleum ether/CHCl<sub>3</sub> (v:v, 6:4) to afford compound **2-TPACNANT** as a yellow solid (510 mg, 63%).

<sup>1</sup>H-NMR (400 MHz, CDCl<sub>3</sub>, ppm): δ 8.53 (s, 1H), 8.38 (d, 1H), 8.30 (d, 1H), 7.85 (d, 2H), 7.74-7.83 (m, 4H), 7.51 (s, 1H), 7.49 (d, 2H), 7.33 (t, 4H), 7.18 (d, 3H), 7.12-7.15 (m, 3H), 7.06-7.12 (m, 2H), 4.20 (t, 4H), 2.04-2.09 (m, 4H), 1.66-1.71 (m, 4H), 1.32-1.49 (m, 20H), 0.89-0.93 (m, 6H).  
<sup>13</sup>C-NMR (CDCl<sub>3</sub>, ppm) δ 150.20, 148.16, 147.75, 146.79, 146.71, 141.50, 136.51, 134.31, 131.41, 130.88, 129.74, 129.68, 129.63, 127.99, 127.91, 126.66, 126.37, 125.90, 125.68, 125.52, 125.45, 124.82, 124.57, 124.52, 124.49, 123.92, 122.99, 122.92, 121.08, 120.56, 118.86, 107.49, 32.03, 30.90, 30.86, 29.76, 26.44, 22.86, 14.26; MALDI-TOF HRMS: **805.85** [M<sup>+</sup>] (calcd for C<sub>57</sub>H<sub>60</sub>N<sub>2</sub>O<sub>2</sub>: **805.10**).

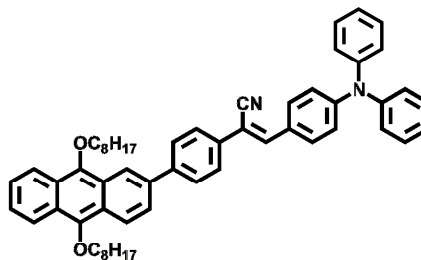

**2-TPACNANT**

### 3. *2,6-bis-[4-(N,N-diphenylamino)phenyl]-acrylonitrile-(9,10-bis(octyloxy)anthracene (2,6-TPACNANT):*

Dry and degassed EtOH (4 mL) and 2 M aqueous Na<sub>2</sub>CO<sub>3</sub> (8 mL) were added to the solution of compound **1** (464 mg, 0.93 mmol), compound **A** (272 mg, 0.46 mmol) and Pd(PPh<sub>3</sub>)<sub>4</sub> (30 mg, 0.026 mmol) in 16 mL toluene under nitrogen atmosphere. After being refluxed at 110<sup>0</sup>C for 48 h, the mixture was poured into water (100 mL) and the organic layer was extracted with chloroform (3×40 mL) and the combined organic layers were dried over anhydrous Na<sub>2</sub>SO<sub>4</sub>. The organic solvent was evaporated under reduced pressure and the crude product was purified by silica column chromatography eluting with petroleum ether/CHCl<sub>3</sub> (v:v, 6:4) to afford compound **2,6-TPACNANT** as a yellow solid (280 mg, 51%). <sup>1</sup>H-NMR (400 MHz, CDCl<sub>3</sub>, ppm): δ 8.53 (s, 2H), 8.39 (d, 2H), 7.86 (d, 4H), 7.78-7.83 (m, 8H), 7.52 (s, 2H), 7.32 (t, 8H), 7.11-7.7.18 (m, 12H), 7.07 (d, 4H), 4.25 (t, 4H), 2.07-2.10 (m, 4H), 1.60-1.73 (m, 4H), 1.32-1.49 (m, 20H), 0.89-

0.93 (m, 6H).  $^{13}\text{C}$ -NMR ( $\text{CDCl}_3$ , ppm)  $\delta$  150.20, 148.16, 147.75 146.79, 146.71, 141.50, 136.51, 134.31, 131.41, 130.88, 129.74, 129.68, 129.63, 127.99, 127.91, 126.66, 126.37, 125.90, 125.68, 125.52, 125.45, 124.82, 124.57, 124.52, 124.49, 123.92, 122.99, 122.92. 121.08, 120.56, 118.86, 107.49, 32.03, 30.90, 30.86, 29.76, 26.44, 22.86, 14.26; MALDI-TOF HRMS: **1176.52** [ $\text{M}^+$ ] (calcd for  $\text{C}_{84}\text{H}_{78}\text{N}_2\text{O}_2$  : **1175.54**).

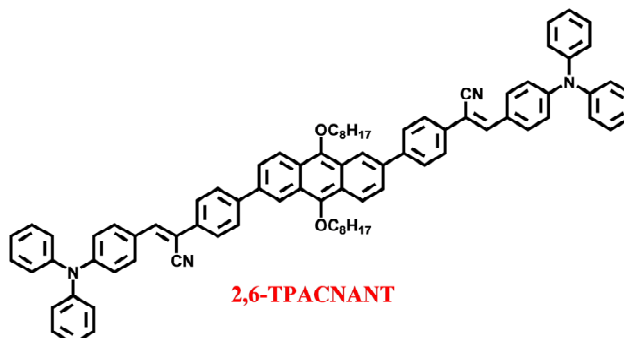

4. **2,6-bis-[4-(N,N-diphenylamino)phenyl]-(9,10-bis(octyloxy)anthracene (2,6-TPAANT):**

Dry and degassed EtOH (8 mL) and 2 M aqueous  $\text{Na}_2\text{CO}_3$  (16 mL) were added to the solution of compound **2** (560 mg, 1.5 mmol), compound **A** (355 mg, 0.60 mmol) and  $\text{Pd}(\text{PPh}_3)_4$  (34 mg, 0.03 mmol) in 32 mL toluene under nitrogen atmosphere. After being refluxed at  $110^\circ\text{C}$  for 48 h, the mixture was poured into water (100 mL) and the organic layer was extracted with chloroform (3 $\times$ 40 mL) and the combined organic layers were dried over anhydrous  $\text{Na}_2\text{SO}_4$ . The organic solvent was evaporated under reduced pressure and the crude product was purified by silica column chromatography eluting with petroleum ether/ $\text{CHCl}_3$  (v:v, 6:4) to afford compound **2,6-TPACNANT** as a bright yellow solid (344 mg, 62%).

$^1\text{H}$ -NMR ( $\text{CDCl}_3$ , ppm):  $\delta$  8.45 (s, 2H), 8.33 (d, 2H), 7.76 (d, 2H), 7.69 (d, 4H), 7.31 (t, 8H), 7.17-7.21 (m, 12H), 7.06 (t, 4H), 4.21 (t, 4H), 2.05-2.08 (m, 4H), 1.68-1.71 (m, 4H), 1.28-1.49 (m, 20H), 0.89 (t, 6H).  $^{13}\text{C}$ -NMR (500 MHz,  $\text{CDCl}_3$ , ppm)  $\delta$  147.81, 136.92, 134.98, 129.48, 128.03, 125.63, 125.15, 124.77, 123.93, 123.24, 119.44, 32.00, 30.92, 29.75, 29.52, 26.59, 22.81, 14.25. MALDI-TOF HRMS: 920.90 [ $\text{M}^+$ ] (calcd for  $\text{C}_{66}\text{H}_{68}\text{N}_2\text{O}_2$  : **921.26**).

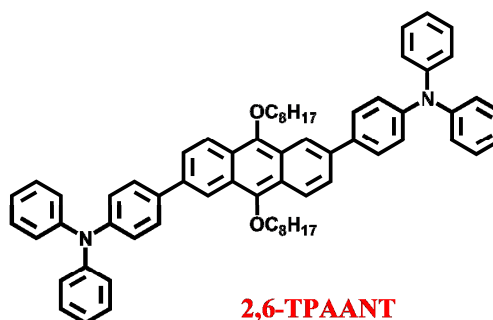

2. <sup>1</sup>H-NMR and <sup>13</sup>C-NMR and MALDI-TOF HRMS spectra:

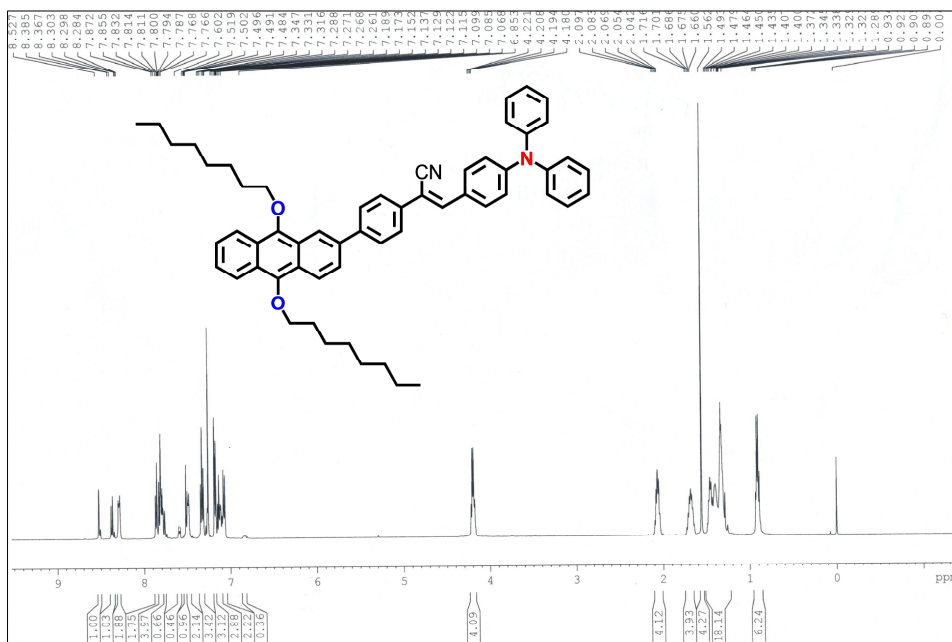

Figure Sa. <sup>1</sup>H-NMR spectrum of 2-TPACNANT.

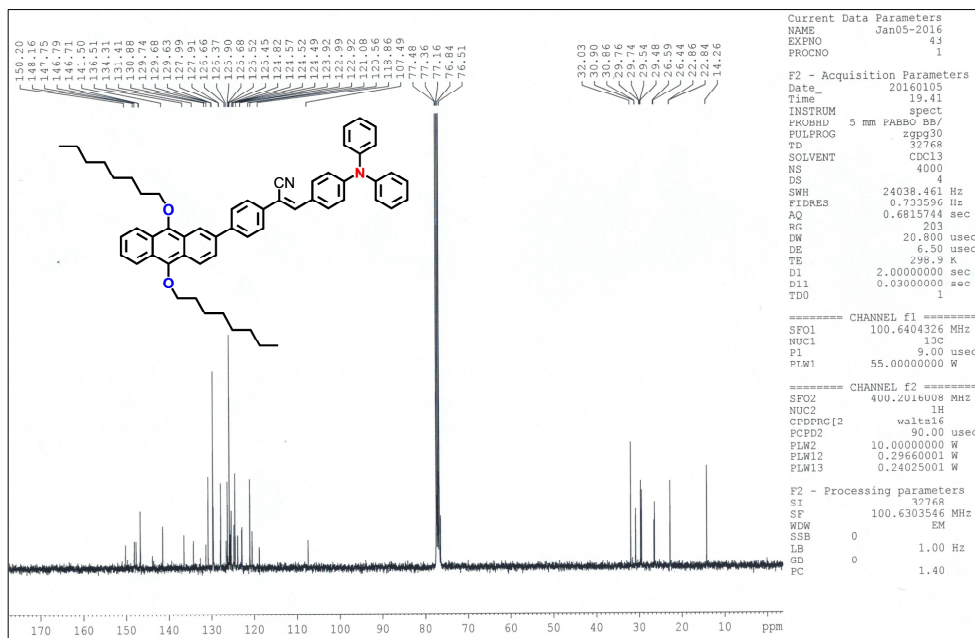

Figure Sb. <sup>13</sup>C-NMR spectrum of 2-TPACNANT

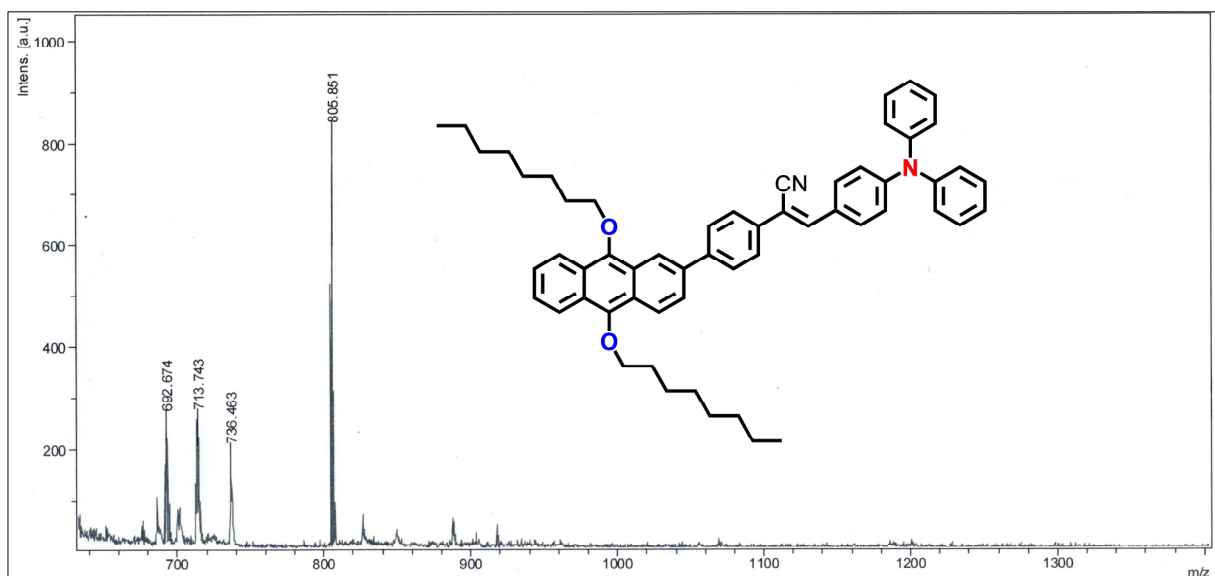

Figure Sc. MALDI-TOF spectrum of 2-TPACNANT

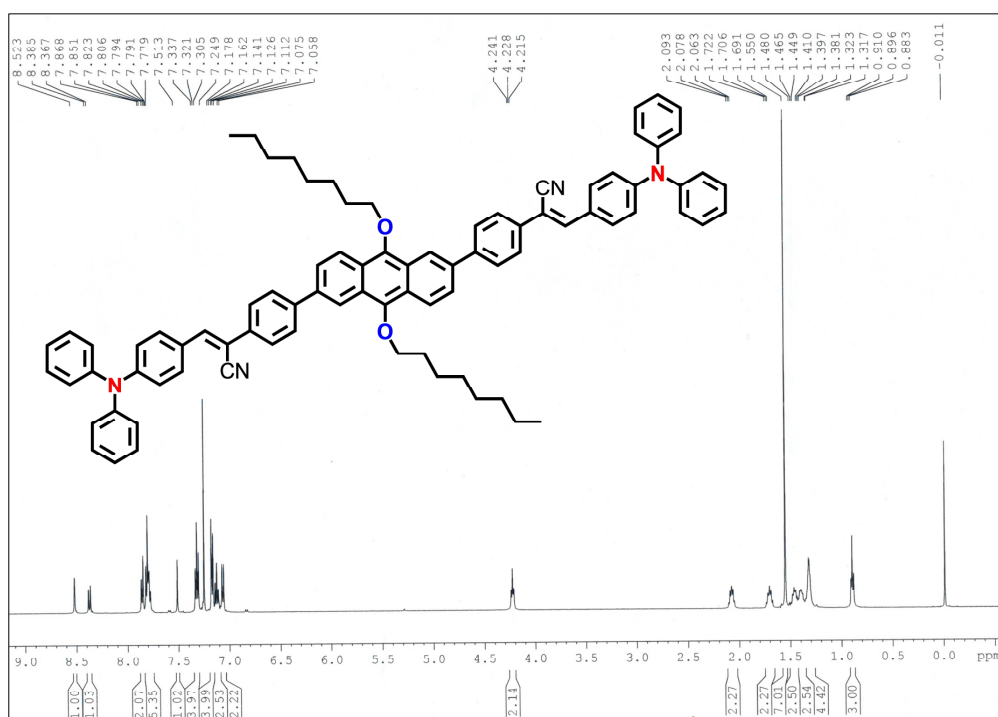

Figure Sd.  $^1\text{H}$  NMR spectrum of 2,6-TPACNANT

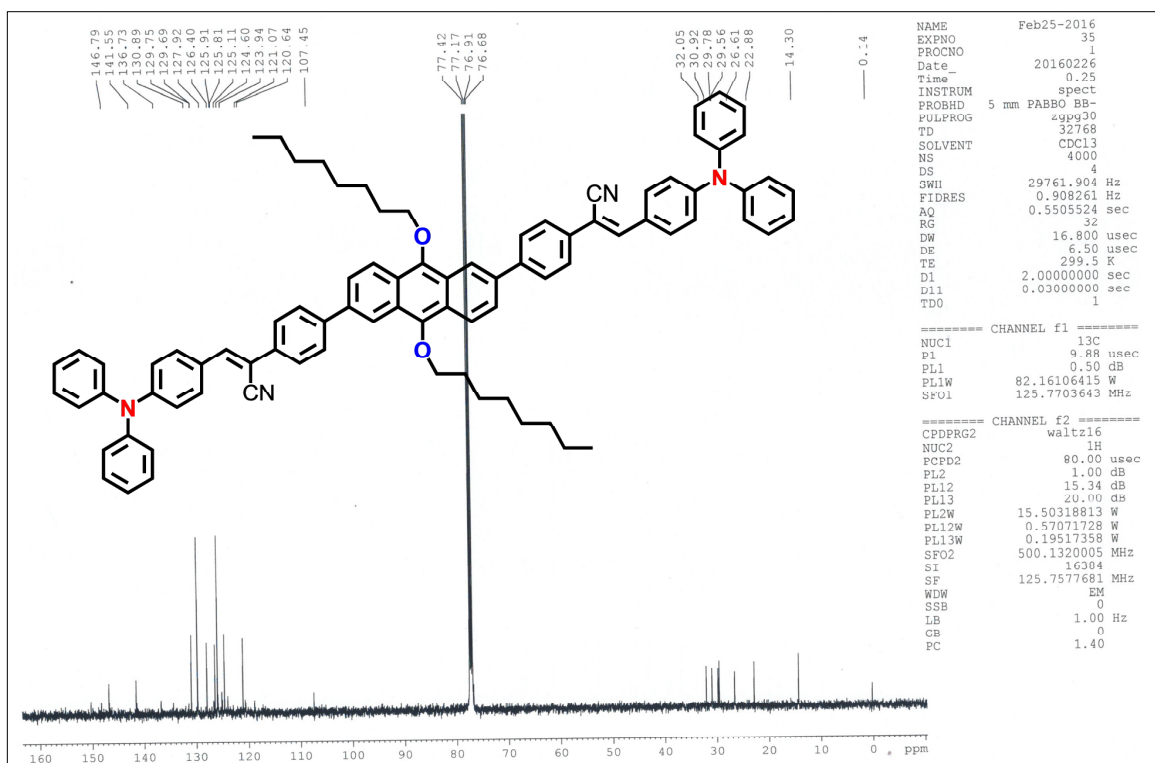

Figure Se.  $^{13}\text{C}$ -NMR spectrum of 2,6-TPACNANT

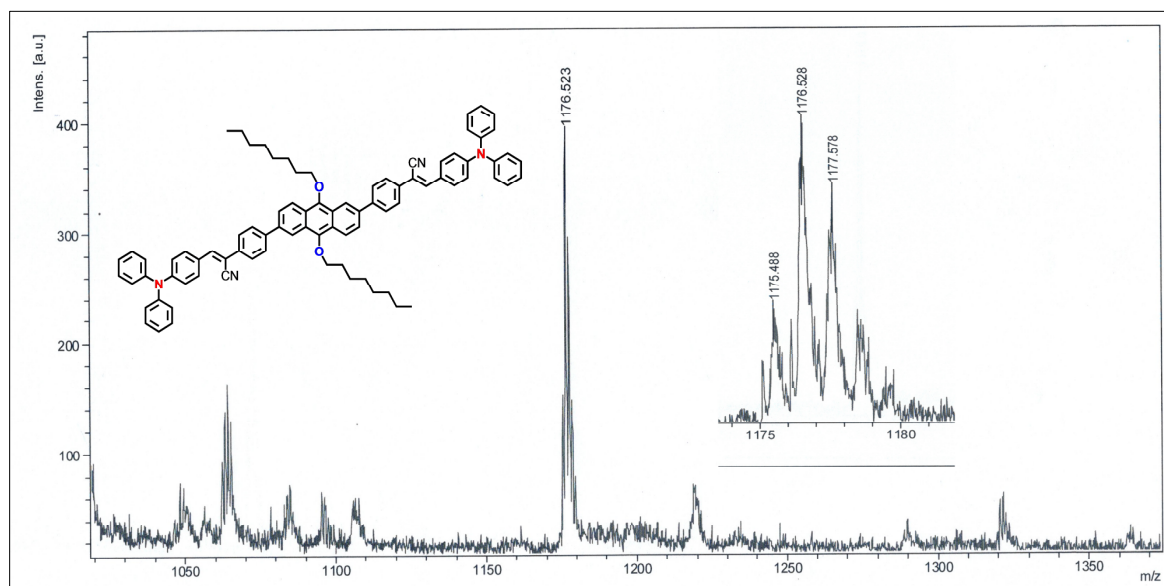

Figure Sf. MALDI-TOF spectrum of 2,6-TPACNANT

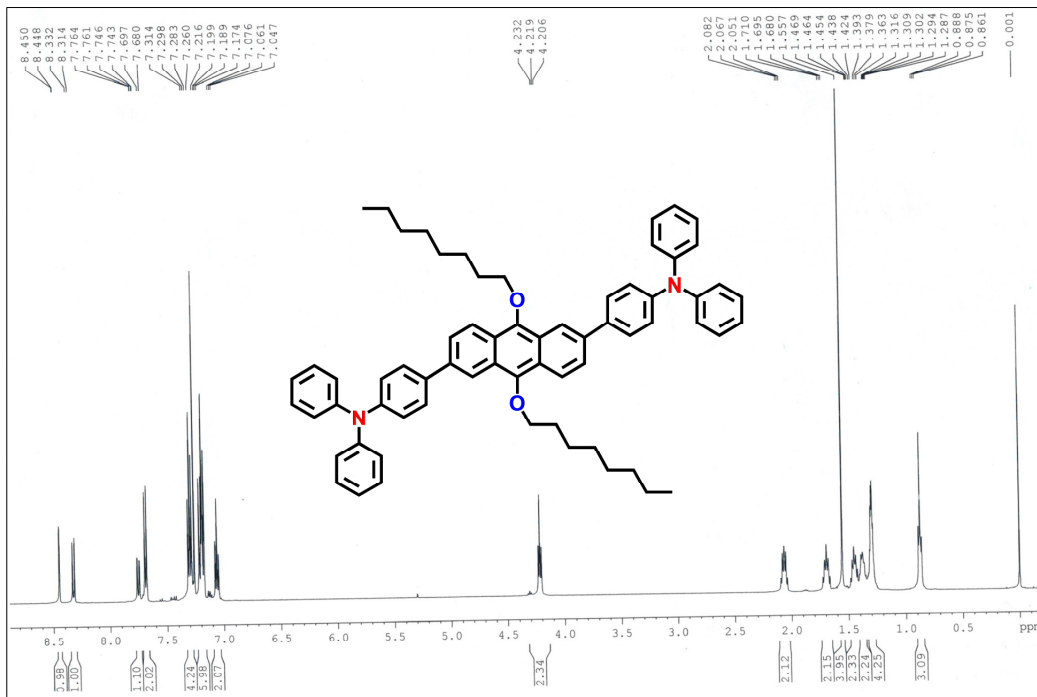

Figure Sg.  $^1\text{H}$  NMR spectrum of 2,6-TPAANT

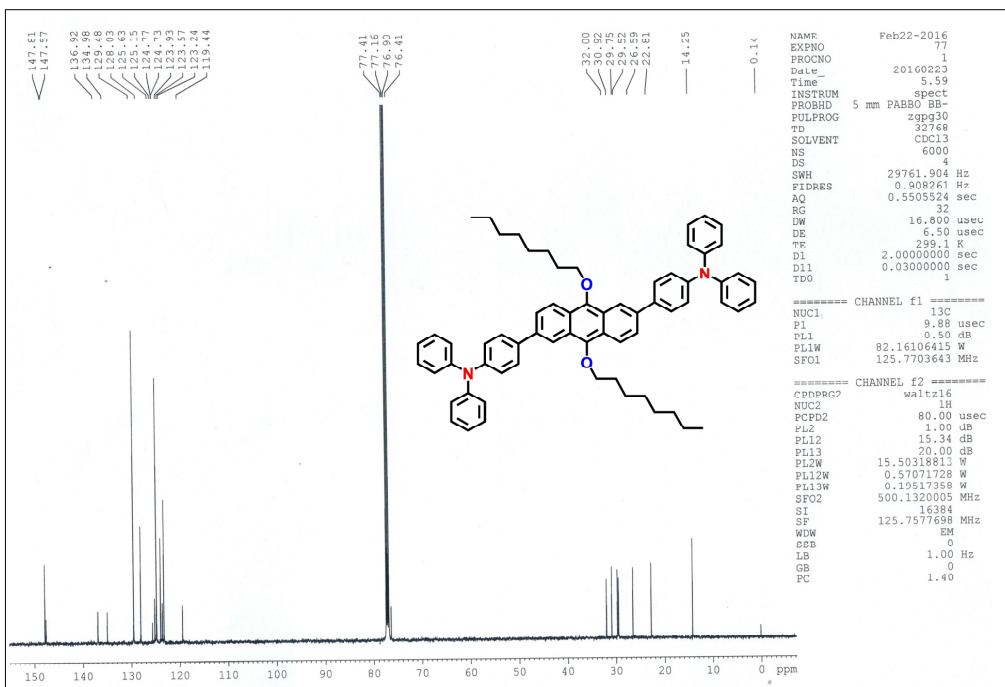

Figure Sh.  $^{13}\text{C}$  NMR spectrum of 2,6-TPAANT

Comment 1  
Comment 2

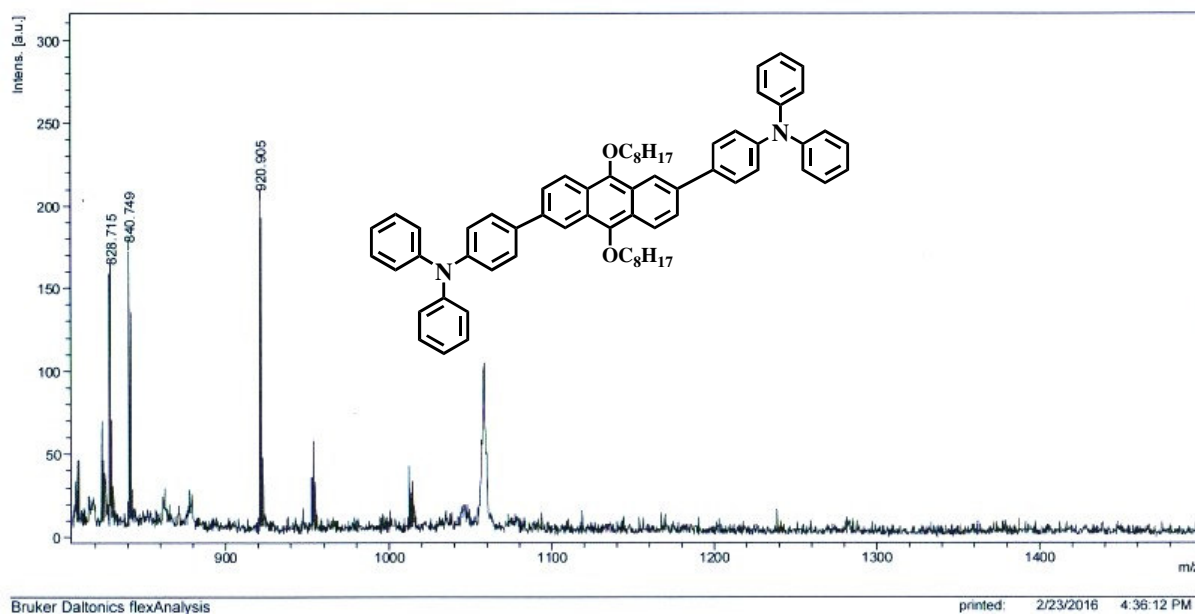

Figure Si. MALDI-TOF spectrum of 2,6-TPAANT



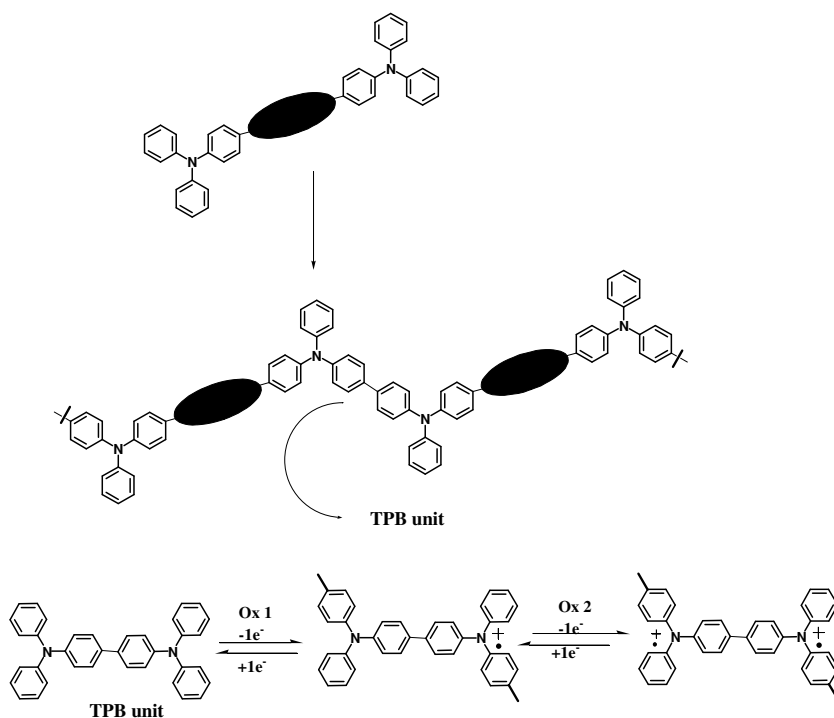

**Scheme S1.** Electropolymerization and the possible path of oxidation process.

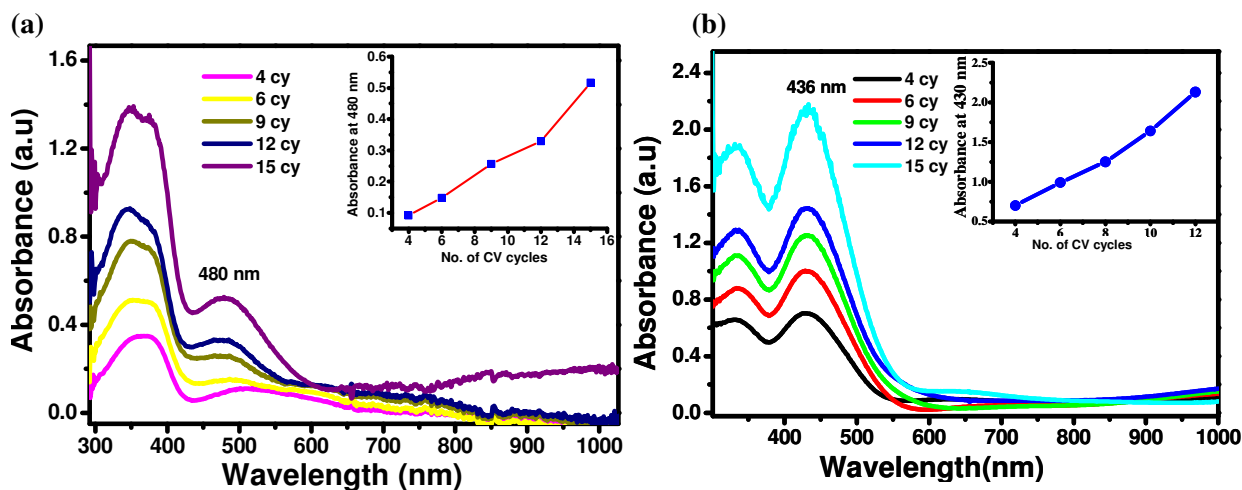

**Figure S1.** Absorption spectra of (a) *p*-2,6-TPAANT and (b) *p*-2,6-TPACNANT on ITO electrodes obtained after 4, 6, 9, and 12 CV and 15 scan cycles in electro-polymerization process. (Inset) Relationship between the absorbance of *p*-2,6-TPAANT electrodes at 480 nm and *p*-2,6-TPAANT at 436 nm vs the number of CV cycles.

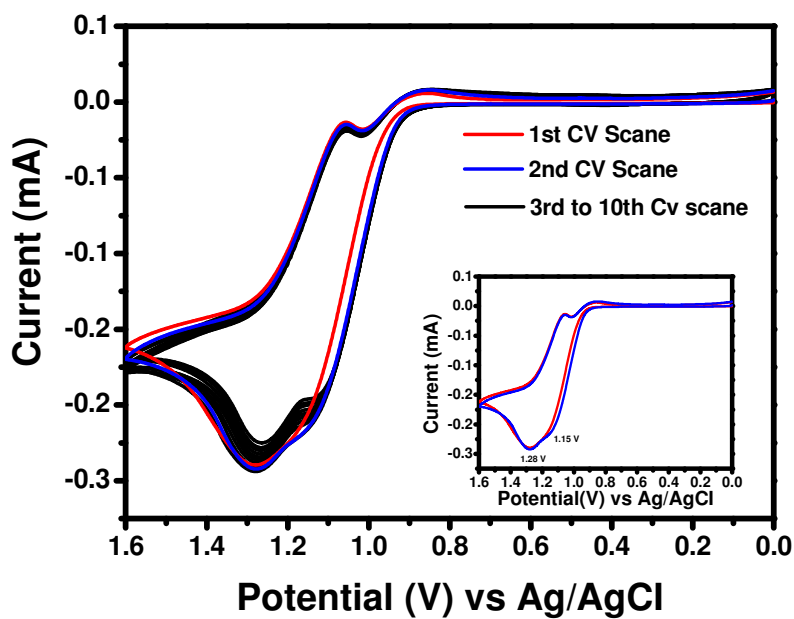

**Figure S2.** Repeated CV scanning of (a) **2-TPACNANT** between 0 and 1.6 V in 0.1 M  $\text{Bu}_4\text{NClO}_4/\text{DCM}$  with a scan rate of 50 mV/s. The inset in displays the first and second scan.

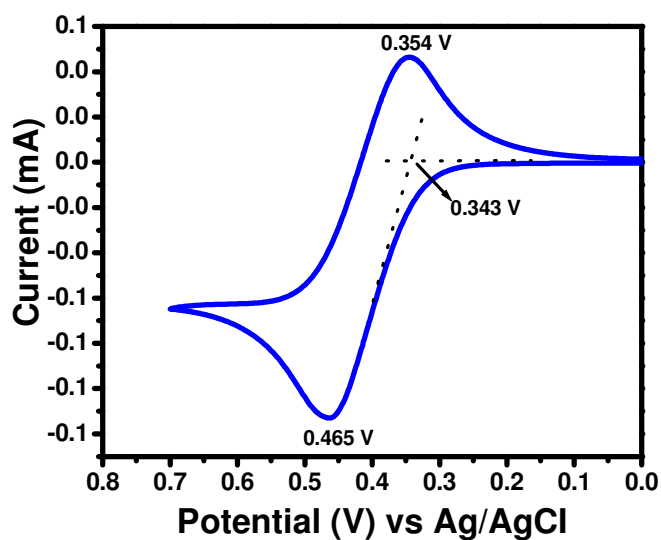

**Figure S3.** The CV diagram of 1mM ferrocene standard in 0.1 M  $\text{Bu}_4\text{NClO}_4/\text{MeCN}$  with a scan rate of 50 mV/s.

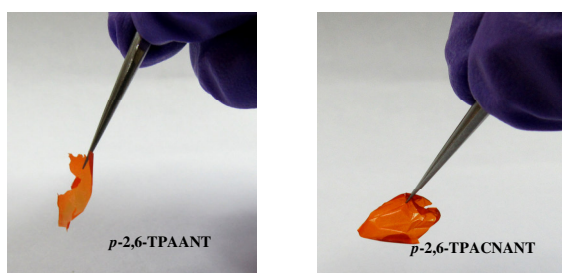

Figure S4. The polymer film removed from ITO glass.

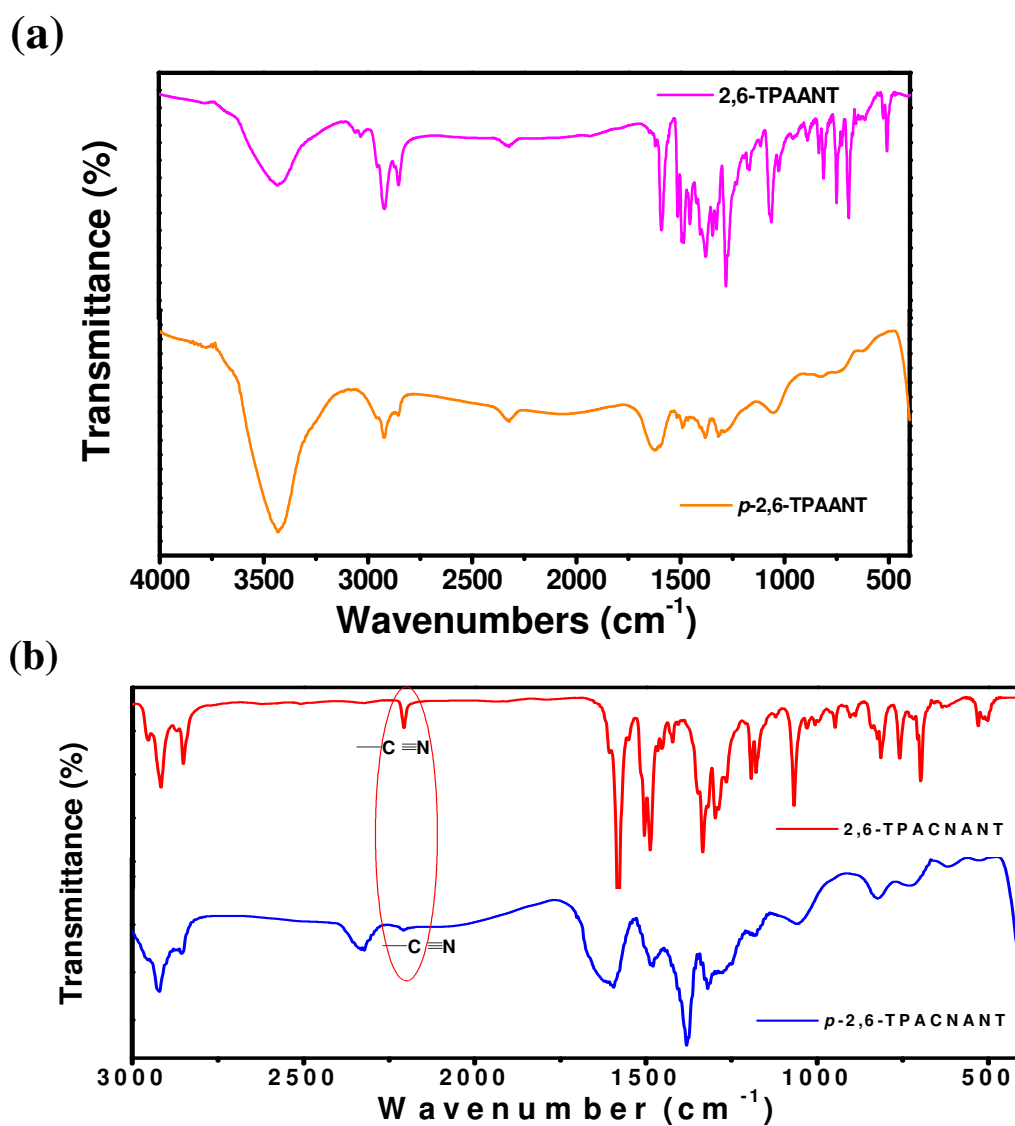

Figure S5. IR spectra of the monomer and polymer of (a) 2,6-TPAANT and *p*-2,6-TPAANT (b) 2,6-TPACNANT and *p*-2,6-TPACNANT .

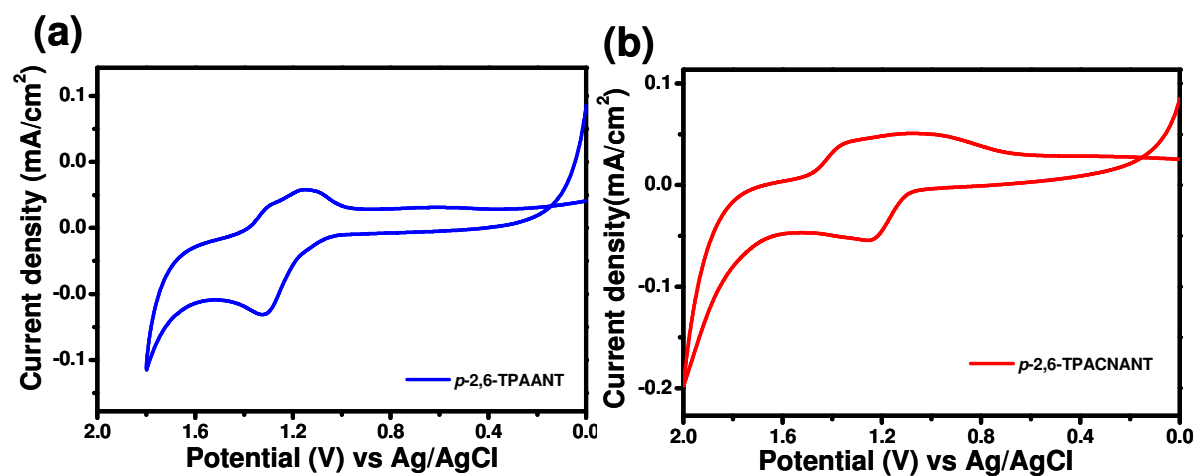

**Figure S6.** Cyclic voltammograms of the fabricated electrochromic device based on polymer film for (a) *p*-2,6-TPAANT and (b) *p*-2,6-TPACNANT.
